# Supplementary material for: Association of Cardiovascular Health Assessed by the New Life's Essential 8 Metrics With Years Lived Without Cardiovascular Disease
Source: PubMed Central journal article supplement — J Am Heart Assoc. 2023 May 26;12(11):e029241. doi: 10.1161/JAHA.122.029241 (PMC10381977; doi:10.1161/jaha.122.029241), 2023-05-26
Supplement: JAH3-12-e029241-s001.pdf [file JAH3-12-e029241-s001.pdf]

# **Supplemental Material**

**Table S1. Definition and scoring approach for quantifying CVH of LE8.**

| Domain           | CVH metric      | Method of measurement                                              | Quantification of CVH metric                                                                                              |  |  |
|------------------|-----------------|--------------------------------------------------------------------|---------------------------------------------------------------------------------------------------------------------------|--|--|
| Health behaviors | Diet            | Measurement:<br>Self-reported intake of salt, fatty foods, and tea | Metric: Surrogate measurement of diet quality, calculated as the unweighted average of salt, fatty food, and tea scoring. |  |  |
|                  |                 | Scoring:                                                           |                                                                                                                           |  |  |
|                  |                 | Points                                                             | Levels/Frequency                                                                                                          |  |  |
|                  |                 | Salt intake                                                        |                                                                                                                           |  |  |
|                  |                 | 100                                                                | < 6g/day                                                                                                                  |  |  |
|                  |                 | 50                                                                 | 6–12 g/day                                                                                                                |  |  |
|                  |                 | 0                                                                  | > 12 g/day                                                                                                                |  |  |
|                  |                 | Fatty food intake                                                  |                                                                                                                           |  |  |
|                  |                 | 100                                                                | < 1 time/week                                                                                                             |  |  |
|                  |                 | 50                                                                 | 1–3 times/week                                                                                                            |  |  |
| 0                | >3 times/week   |                                                                    |                                                                                                                           |  |  |
| Tea consumption  |                 |                                                                    |                                                                                                                           |  |  |
| 100              | >3 times/week   |                                                                    |                                                                                                                           |  |  |
| 75               | 1–3 times/week  |                                                                    |                                                                                                                           |  |  |
| 50               | 1–3 times/month |                                                                    |                                                                                                                           |  |  |
| 25               | < 1 time/month  |                                                                    |                                                                                                                           |  |  |
| 0                | Never           |                                                                    |                                                                                                                           |  |  |

**Continued**

| <b>Domain</b>    | <b>Metric</b>                    | <b>Method of measurement</b>                                                                                                                  | <b>Quantification of CVH metrics</b>          |                                 |
|------------------|----------------------------------|-----------------------------------------------------------------------------------------------------------------------------------------------|-----------------------------------------------|---------------------------------|
| Health behaviors | Physical activity                | Measurements:<br>Self-reported minutes of physical activity per week.                                                                         | Metric: Minutes of physical activity per week |                                 |
|                  |                                  | Example tools for measurement:<br>How many times did you usually spend on physical activity<br>(Note: It took at least 20 minutes each time)? | Scoring:<br>Points                            | Minutes                         |
|                  |                                  |                                                                                                                                               | 100                                           | ≥ 80                            |
|                  |                                  |                                                                                                                                               | 50                                            | 20–60                           |
|                  |                                  |                                                                                                                                               | 0                                             | < 20                            |
| Health behaviors | Tobacco/<br>Nicotine<br>exposure | Measurements:<br>Self-reported use of cigarettes                                                                                              | Metric: Smoking                               |                                 |
|                  |                                  | Example tools for measurement:<br>Do you currently smoke cigarettes?<br>(Never smoker, former smoker, some days, every day)                   | Scoring:<br>Points                            | Status                          |
|                  |                                  |                                                                                                                                               | 100                                           | Never smoker                    |
|                  |                                  |                                                                                                                                               | 50                                            | Former smoker, quit ≥ 1 year    |
|                  |                                  |                                                                                                                                               | 25                                            | Current smoker, < 1 cigarette/d |
|                  |                                  |                                                                                                                                               | 0                                             | Current smoker, ≥ 1 cigarette/d |

## Continued

| Domain           | Metric          | Method of measurement                                       | Quantification of CVH metrics            |               |
|------------------|-----------------|-------------------------------------------------------------|------------------------------------------|---------------|
|                  |                 |                                                             | Metric: Average hours of sleep per night |               |
|                  |                 |                                                             | Scoring:                                 |               |
|                  |                 | Measurements:                                               | Points                                   | Level         |
| Health behaviors | Sleep health    | Self-reported average hours of sleep per night              | 100                                      | 7–< 9         |
|                  |                 |                                                             | 90                                       | 9–< 10        |
|                  |                 | Example tools for measurement:                              | 70                                       | 6–< 7         |
|                  |                 | On average, how many hours of sleep do you get per night?   | 40                                       | 5–< 6 or ≥ 10 |
|                  |                 |                                                             | 20                                       | 4–< 5         |
|                  |                 |                                                             | 0                                        | < 4           |
|                  |                 |                                                             | Metric: BMI (kg/m <sup>2</sup> ) *       |               |
|                  |                 |                                                             | Scoring:                                 |               |
|                  |                 | Measurements:                                               | Points                                   | Level         |
| Health factors   | Body mass index | Body weight (kg) divided by height squared(m <sup>2</sup> ) | 100                                      | < 23.0        |
|                  |                 |                                                             | 70                                       | 23.0–24.9     |
|                  |                 | Example tools for measurement:                              | 30                                       | 25.0–29.9     |
|                  |                 | Objective measurement of height and weight                  | 15                                       | 30.0–34.9     |
|                  |                 |                                                             | 0                                        | ≥ 35.0        |

## Continued

| Domain         | Metric        | Method of measurement                                                                                                     | Quantification of CVH metrics             |                                      |
|----------------|---------------|---------------------------------------------------------------------------------------------------------------------------|-------------------------------------------|--------------------------------------|
| Health factors | Blood lipids  | Measurements:<br>Plasma total and HDL cholesterol with the calculation of non-HDL cholesterol.                            | Metric: Non-HDL cholesterol (mmol/L)      |                                      |
|                |               | Example tools for measurement:<br>Fasting blood sample.<br>Non-HDL cholesterol unit conversion:<br>1 mg/dL=0.02586 mmol/L | Scoring:<br>Points                        | Level                                |
|                |               |                                                                                                                           | 100                                       | < 3.36                               |
|                |               |                                                                                                                           | 60                                        | 3.36–4.13                            |
|                |               |                                                                                                                           | 40                                        | 4.13–4.90                            |
|                |               |                                                                                                                           | 20                                        | 4.90–5.68                            |
|                |               |                                                                                                                           | 0                                         | ≥ 5.69                               |
|                |               |                                                                                                                           | If drug-treated level, subtract 20 points |                                      |
|                |               |                                                                                                                           | Metric: FBG (mmol/L)                      |                                      |
|                |               | Measurements:<br>FBG                                                                                                      | Scoring:                                  |                                      |
|                |               |                                                                                                                           | Points                                    | Level                                |
|                |               |                                                                                                                           | 100                                       | No history of diabetes and FBG < 5.6 |
|                |               |                                                                                                                           | 60                                        | No diabetes and FBG 5.6–6.9          |
|                | Blood glucose | Example tools for measurement:<br>Fasting blood sample.                                                                   | 40                                        | Diabetes with FBG < 8.6              |
|                |               | FBG unit conversion:<br>1 mg/dL = 0.056 mmol/L                                                                            | 30                                        | Diabetes with FBG 8.6–10.1           |
|                |               |                                                                                                                           | 20                                        | Diabetes with FBG 10.2–11.6          |
|                |               |                                                                                                                           | 10                                        | Diabetes with FBG 11.7–13.2          |
|                |               |                                                                                                                           | 0                                         | Diabetes with FBG ≥ 13.3             |

Continued

| Domain         | Metric         | Method of measurement                            | Quantification of CVH metrics             |                                         |
|----------------|----------------|--------------------------------------------------|-------------------------------------------|-----------------------------------------|
|                |                |                                                  | Metric: Systolic and diastolic BPs (mmHg) |                                         |
|                |                |                                                  | Scoring:                                  |                                         |
|                |                | Measurements:                                    | Points                                    | Level                                   |
| Health factors | Blood pressure | Appropriately measured systolic and diastolic BP | 100                                       | <120/<80 (Optimal)                      |
|                |                |                                                  | 75                                        | 120–129/<80 (Elevated)                  |
|                |                | Example tools for measurement:                   | 50                                        | 130–139 or 80–89 (Stage I hypertension) |
|                |                | Corrected Mercury sphygmomanometer               | 25                                        | 140–159 or 90–99                        |
|                |                |                                                  | 0                                         | ≥160 or ≥100                            |
|                |                |                                                  | Subtract 20 points if treated level       |                                         |

BP, blood pressure; CVH, cardiovascular health; FBG, fasting blood glucose; HDL, high-density lipoprotein; LE8, Life's Essential 8.

\* The scoring algorithm of BMI was modified with a lower cutting-off point for each score to better adapt to Chinese population. The original American Heart Association cut points for BMI was <25 kg/m<sup>2</sup> for 100 points, 25.0–29.9 kg/m<sup>2</sup> for 70 points, 30.0–34.9 kg/m<sup>2</sup> for 30 points, 35.0–39.9 kg/m<sup>2</sup> for 15 points, and ≥ 40.0 kg/m<sup>2</sup> for 0 point, respectively.

**Table S2. HR (95%CI) of CVH scores of LE8 for CVD.**

| CVH score     | No. of cases/Total | HR (95% CI)       |                      |
|---------------|--------------------|-------------------|----------------------|
|               |                    | Unadjusted        | Age-and sex-adjusted |
| 0-29 points   | 39/150             | 1.00              | 1.00                 |
| 30-39 points  | 284/1,397          | 0.78 (0.55, 1.08) | 0.75 (0.54, 1.05)    |
| 40-49 points  | 1,229/6,762        | 0.64 (0.47, 0.88) | 0.64 (0.46, 0.88)    |
| 50-59 points  | 2,676/18,261       | 0.46 (0.33, 0.63) | 0.49 (0.36, 0.67)    |
| 60-69 points  | 3,428/29,278       | 0.35 (0.25, 0.48) | 0.39 (0.28, 0.53)    |
| 70-79 points  | 1,899/24,739       | 0.24 (0.18, 0.34) | 0.27 (0.20, 0.37)    |
| 80-89 points  | 406/8,814          | 0.20 (0.14, 0.27) | 0.21 (0.15, 0.30)    |
| 90-100 points | 16/354             | 0.17 (0.09, 0.30) | 0.20 (0.11, 0.36)    |

CVD, cardiovascular disease; CVH, cardiovascular health; CI, confidence interval; HR, hazard ratio; LE8, Life's Essential 8.

**Table S3. HR (95%CI) of overall and domain-specific CVH statuses of LE8 for CVD and its major subtypes.**

| CVH status                    | No. of cases/Total | HR (95% CI)       |                      |
|-------------------------------|--------------------|-------------------|----------------------|
|                               |                    | Unadjusted        | Age-and sex-adjusted |
| <b>Overall</b>                |                    |                   |                      |
| Low (0-49 points)             | 1,552/8,309        | 1.00              | 1.00                 |
| Moderate (50-79 points)       | 8,003/72,278       | 0.51 (0.48, 0.54) | 0.57 (0.54, 0.61)    |
| High (80-100 points)          | 422/9,168          | 0.29 (0.26, 0.33) | 0.33 (0.29, 0.37)    |
| <b>By individual domains</b>  |                    |                   |                      |
| <b>Health behaviors</b>       |                    |                   |                      |
| Low (0-49 points)             | 2,569/22,143       | 1.00              | 1.00                 |
| Moderate (50-79 points)       | 6,971/63,549       | 0.76 (0.73, 0.80) | 0.93 (0.89, 0.97)    |
| High (80-100 points)          | 437/4,063          | 0.51 (0.46, 0.57) | 0.74 (0.67, 0.82)    |
| <b>Health factors</b>         |                    |                   |                      |
| Low (0-49 points)             | 2,191/10,414       | 1.00              | 1.00                 |
| Moderate (50-79 points)       | 5,972/49,101       | 0.62 (0.59, 0.65) | 0.59 (0.56, 0.62)    |
| High (80-100 points)          | 1,814/30,240       | 0.39 (0.37, 0.42) | 0.35 (0.33, 0.38)    |
| <b>For major CVD subtypes</b> |                    |                   |                      |
| <b>Stroke</b>                 |                    |                   |                      |
| Low (0-49 points)             | 988/8,309          | 1.00              | 1.00                 |
| Moderate (50-79 points)       | 4,810/72,278       | 0.49 (0.46, 0.53) | 0.57 (0.55, 0.60)    |
| High (80-100 points)          | 233/9,168          | 0.26 (0.23, 0.30) | 0.43 (0.40, 0.46)    |
| <b>Heart diseases</b>         |                    |                   |                      |
| Low (0-49 points)             | 678/8,309          | 1.00              | 1.00                 |
| Moderate (50-79 points)       | 3,696/72,278       | 0.49 (0.46, 0.53) | 0.60 (0.55, 0.65)    |
| High (80-100 points)          | 203/9,168          | 0.26 (0.23, 0.30) | 0.36 (0.31, 0.42)    |

CVD, cardiovascular disease; CVH, cardiovascular health; CI, confidence interval; HR, hazard ratio; LE8, Life's Essential 8.



**Table S4. Estimated numbers of CVD-free life years by component-specific CVH status of LE8.**

| CVH status                       | No. of cases/Total | CVD-free life years from age 30 to 80 years (95%CI) |                       | HR (95%CI)        |                       |
|----------------------------------|--------------------|-----------------------------------------------------|-----------------------|-------------------|-----------------------|
|                                  |                    | Unadjusted                                          | Age-and sex- adjusted | Unadjusted        | Age-and sex- adjusted |
| <b>Diet</b>                      |                    |                                                     |                       |                   |                       |
| Low (0-49 points)                | 7,584/67,038       | 46.7 (46.7, 46.8)                                   | 43.4 (43.1, 43.6)     | 1.00              | 1.00                  |
| Moderate (50-79 points)          | 2,158/20,743       | 46.9 (46.8, 47.0)                                   | 43.6 (43.3, 43.9)     | 0.94 (0.90, 0.99) | 0.94 (0.89, 0.98)     |
| High (80-100 points)             | 235/1,974          | 47.2 (46.8, 47.5)                                   | 43.7 (43.1, 44.3)     | 0.85 (0.75, 0.97) | 0.92 (0.81, 1.05)     |
| <b>Physical activity</b>         |                    |                                                     |                       |                   |                       |
| Low (0-49 points)                | 743/7,915          | 46.2 (45.9, 46.4)                                   | 43.5 (43.0, 43.9)     | 1.00              | 1.00                  |
| Moderate (50-79 points)          | 7,331/68,298       | 46.7 (46.6, 46.8)                                   | 43.4 (43.0, 43.6)     | 0.86 (0.80, 0.93) | 1.03 (0.95, 1.11)     |
| High (80-100 points)             | 1,903/13,542       | 47.3 (47.2, 47.4)                                   | 43.7 (43.4, 44.0)     | 0.68 (0.62, 0.74) | 0.94 (0.86, 1.03)     |
| <b>Tobacco/nicotine exposure</b> |                    |                                                     |                       |                   |                       |
| Low (0-49 points)                | 3,626/30,785       | 46.1 (46, 46.2)                                     | 43.1 (42.7, 43.3)     | 1.00              | 1.00                  |
| Moderate (50-79 points)          | 649/4,633          | 47.2 (47, 47.4)                                     | 43.6 (43.1, 44.0)     | 0.68 (0.63, 0.74) | 0.89 (0.82, 0.97)     |
| High (80-100 points)             | 5,702/54,337       | 47.1 (47, 47.1)                                     | 43.5 (43.2, 43.7)     | 0.72 (0.69, 0.75) | 0.91 (0.87, 0.95)     |
| <b>Sleep health</b>              |                    |                                                     |                       |                   |                       |
| Low (0-49 points)                | 1,140/8,574        | 47.1 (46.9, 47.3)                                   | 43.4 (43.0, 43.8)     | 1.00              | 1.00                  |

| CVH status              | No. of cases/Total | CVD-free life years from age 30 to 80 years (95%CI) |                       | HR (95%CI)        |                       |
|-------------------------|--------------------|-----------------------------------------------------|-----------------------|-------------------|-----------------------|
|                         |                    | Unadjusted                                          | Age-and sex- adjusted | Unadjusted        | Age-and sex- adjusted |
| Moderate (50-79 points) | 2,039/17,207       | 46.9 (46.8, 47.0)                                   | 43.6 (43.2, 43.9)     | 1.08 (1.01, 1.16) | 0.97 (0.90, 1.04)     |
| High (80-100 points)    | 6,798/63,974       | 46.7 (46.6, 46.8)                                   | 43.4 (43.1, 43.6)     | 1.16 (1.09, 1.24) | 1.01 (0.95, 1.07)     |
| <b>BMI</b>              |                    |                                                     |                       |                   |                       |
| Low (0-49 points)       | 1,085/7,122        | 45.5 (45.2, 45.7)                                   | 41.6 (41.2, 41.9)     | 1.00              | 1.00                  |
| Moderate (50-79 points) | 6,717/56,639       | 46.6 (46.5, 46.7)                                   | 43.3 (43.0, 43.5)     | 0.71 (0.67, 0.76) | 0.69 (0.65, 0.74)     |
| High (80-100 points)    | 2,175/25,994       | 47.6 (47.5, 47.7)                                   | 44.5 (44.2, 44.8)     | 0.49 (0.46, 0.53) | 0.52 (0.48, 0.55)     |
| <b>Blood lipids</b>     |                    |                                                     |                       |                   |                       |
| Low (0-49 points)       | 2,703/19,948       | 46.3 (46.1, 46.4)                                   | 42.7 (42.4, 43.0)     | 1.00              | 1.00                  |
| Moderate (50-79 points) | 2,977/25,998       | 46.7 (46.5, 46.8)                                   | 43.4 (43.0, 43.6)     | 0.87 (0.83, 0.92) | 0.87 (0.82, 0.91)     |
| High (80-100 points)    | 4,297/43,809       | 47.1 (47.0, 47.2)                                   | 43.9 (43.6, 44.2)     | 0.74 (0.70, 0.77) | 0.76 (0.73, 0.80)     |
| <b>Blood glucose</b>    |                    |                                                     |                       |                   |                       |
| Low (0-49 points)       | 1,681/8,073        | 45.5 (45.2, 45.6)                                   | 40.9 (40.5, 41.2)     | 1.00              | 1.00                  |
| Moderate (50-79 points) | 2,200/18,650       | 46.6 (46.4, 46.7)                                   | 43.2 (42.9, 43.5)     | 0.72 (0.68, 0.77) | 0.61 (0.57, 0.65)     |
| High (80-100 points)    | 6,096/63,032       | 47.1 (47.0, 47.2)                                   | 43.8 (43.5, 44.1)     | 0.60 (0.57, 0.63) | 0.53 (0.50, 0.56)     |
| <b>Blood pressure</b>   |                    |                                                     |                       |                   |                       |

| CVH status              | No. of cases/Total | CVD-free life years from age 30 to 80 years (95%CI) |                       | HR (95%CI)        |                       |
|-------------------------|--------------------|-----------------------------------------------------|-----------------------|-------------------|-----------------------|
|                         |                    | Unadjusted                                          | Age-and sex- adjusted | Unadjusted        | Age-and sex- adjusted |
| Low (0-49 points)       | 4,714/25,586       | 45.9 (45.8, 46.0)                                   | 41.4 (41.0, 41.7)     | 1.00              | 1.00                  |
| Moderate (50-79 points) | 4,273/45,335       | 47.2 (47.1, 47.3)                                   | 43.9 (43.6, 44.2)     | 0.65 (0.62, 0.67) | 0.57 (0.55, 0.60)     |
| High (80-100 points)    | 990/18,834         | 47.6 (47.5, 47.7)                                   | 45.1 (44.7, 45.4)     | 0.55 (0.51, 0.59) | 0.43 (0.40, 0.46)     |

BMI, body mass index; CVD, cardiovascular disease; CVH, cardiovascular health; CI, confidence interval; LE8, Life's Essential 8; HR, hazard ratio.

**Table S5. Estimated numbers of CVD-free life years by CVH status of LE8 for CVD subtypes.**

| CVH status                     | No. of cases/Total | CVD-free life years from age 30 to 80 years (95%CI) |                       | HR (95%CI)        |                       |
|--------------------------------|--------------------|-----------------------------------------------------|-----------------------|-------------------|-----------------------|
|                                |                    | Unadjusted                                          | Age-and sex- adjusted | Unadjusted        | Age-and sex- adjusted |
| <b>Cerebral infarction</b>     |                    |                                                     |                       |                   |                       |
| Low (0-49 points)              | 878/8,309          | 46.7 (46.5, 46.9)                                   | 43.2 (42.7, 43.7)     | 1.00              | 1.00                  |
| Moderate (50-79 points)        | 4,118/72,278       | 48.3 (48.3, 48.4)                                   | 45.5 (45.2, 45.8)     | 0.47 (0.44, 0.51) | 0.55 (0.51, 0.59)     |
| High (80-100 points)           | 193/9,168          | 49.1 (48.9, 49.2)                                   | 47.3 (46.9, 47.6)     | 0.25 (0.21, 0.29) | 0.29 (0.25, 0.34)     |
| <b>Intracranial hemorrhage</b> |                    |                                                     |                       |                   |                       |
| Low (0-49 points)              | 122/8,309          | 49.4 (49.4, 49.5)                                   | 49.2 (49.0, 49.4)     | 1.00              | 1.00                  |
| Moderate (50-79 points)        | 760/72,278         | 49.6 (49.6, 49.6)                                   | 49.4 (49.3, 49.5)     | 0.66 (0.55, 0.80) | 0.74 (0.61, 0.90)     |
| High (80-100 points)           | 38/9,168           | 49.7 (49.7, 49.8)                                   | 49.6 (49.5, 49.7)     | 0.36 (0.25, 0.52) | 0.40 (0.28, 0.58)     |
| <b>Subarachnoid hemorrhage</b> |                    |                                                     |                       |                   |                       |
| Low (0-49 points)              | 20/8,309           | 49.8 (49.8, 49.9)                                   | 49.7 (49.6, 49.8)     | 1.00              | 1.00                  |
| Moderate (50-79 points)        | 125/72,278         | 49.8 (49.8, 49.9)                                   | 49.8 (49.7, 49.8)     | 0.67 (0.42, 1.08) | 0.71 (0.44, 1.14)     |
| High (80-100 points)           | 13/9,168           | 49.8 (49.8, 49.9)                                   | 49.8 (49.7, 49.8)     | 0.76 (0.38, 1.53) | 0.68 (0.33, 1.40)     |
| <b>Myocardial infarction</b>   |                    |                                                     |                       |                   |                       |
| Low (0-49 points)              | 244/8,309          | 49.0 (48.9, 49.1)                                   | 48.5 (48.2, 48.7)     | 1.00              | 1.00                  |

| CVH status                 | No. of cases/Total | CVD-free life years from age 30 to 80 years (95%CI) |                       | HR (95%CI)        |                       |
|----------------------------|--------------------|-----------------------------------------------------|-----------------------|-------------------|-----------------------|
|                            |                    | Unadjusted                                          | Age-and sex- adjusted | Unadjusted        | Age-and sex- adjusted |
| Moderate (50-79 points)    | 1,304/72,278       | 49.4 (49.4, 49.4)                                   | 49.0 (48.8, 49.1)     | 0.55 (0.48, 0.63) | 0.64 (0.56, 0.73)     |
| High (80-100 points)       | 43/9,168           | 49.7 (49.7, 49.8)                                   | 49.5 (49.4, 49.6)     | 0.20 (0.15, 0.28) | 0.25 (0.18, 0.34)     |
| <b>Atrial fibrillation</b> |                    |                                                     |                       |                   |                       |
| Low (0-49 points)          | 132/8309           | 49.4 (49.3, 49.5)                                   | 48.1 (47.7, 48.6)     | 1.00              | 1.00                  |
| Moderate (50-79 points)    | 865/72278          | 49.6 (49.6, 49.6)                                   | 48.6 (48.4, 48.9)     | 0.63 (0.53, 0.76) | 0.70 (0.58, 0.84)     |
| High (80-100 points)       | 73/9168            | 49.6 (49.5, 49.7)                                   | 48.7 (48.4, 49.0)     | 0.60 (0.45, 0.79) | 0.65 (0.49, 0.87)     |
| <b>Heart failure</b>       |                    |                                                     |                       |                   |                       |
| Low (0-49 points)          | 390/8,309          | 48.5 (48.4, 48.6)                                   | 46.0. (45.5, 46.5)    | 1.00              | 1.00                  |
| Moderate (50-79 points)    | 2,051/72,278       | 49.2 (49.1, 49.2)                                   | 47.5 (47.2, 47.8)     | 0.51 (0.46, 0.57) | 0.56 (0.50, 0.62)     |
| High (80-100 points)       | 118/9,168          | 49.4 (49.3, 49.5)                                   | 48.3 (48.0, 48.6)     | 0.32 (0.26, 0.40) | 0.35 (0.28, 0.43)     |

CVD, cardiovascular disease; CVH, cardiovascular health; CI, confidence interval; LE8, Life's Essential 8; HR, hazard ratio.

**Table S6. Estimated numbers of CVD-free life years by CVH status of LE8, excluding 20,644 individuals exposed to dust in underground coal mines.**

| CVH status              | No. of cases/Total | CVD-free life years from age 30 to 80 years (95%CI) |                       |
|-------------------------|--------------------|-----------------------------------------------------|-----------------------|
|                         |                    | Unadjusted                                          | Age-and sex- adjusted |
| Low (0-49 points)       | 983/4,992          | 44.7 (44.4, 45.0)                                   | 40.6 (40.2, 41.1)     |
| Moderate (50-79 points) | 6,268/55,915       | 47.0 (46.9, 47.0)                                   | 43.3 (43.0, 43.6)     |
| High (80-100 points)    | 349/8,204          | 48.2 (48.0, 48.4)                                   | 45.7 (45.2, 46.1)     |

CVD, cardiovascular disease; CVH, cardiovascular health; CI, confidence interval; LE8, Life's Essential 8.

**Table S7. Estimated numbers of CVD-free life years by CVH status of LE8, excluding 1,025 incident CVD occurred within the initial two-year follow-up.**

| <b>CVH status</b>       | <b>No. of cases/Total</b> | <b>CVD-free life years from age 30 to 80 years (95%CI)</b> |                              |
|-------------------------|---------------------------|------------------------------------------------------------|------------------------------|
|                         |                           | <b>Unadjusted</b>                                          | <b>Age-and sex- adjusted</b> |
| Low (0-49 points)       | 1,396/8,153               | 45.0 (44.7, 45.2)                                          | 40.2 (39.8, 40.5)            |
| Moderate (50-79 points) | 7,169/71,444              | 47.2 (47.1, 47.3)                                          | 42.6 (42.3, 42.9)            |
| High (80-100 points)    | 387/9,133                 | 48.3 (48.1, 48.4)                                          | 44.7 (44.3, 45.1)            |

CVD, cardiovascular disease; CVH, cardiovascular health; CI, confidence interval; LE8, Life's Essential 8.

**Table S8. Estimated numbers of CVD-free life years by CVH status of LE8, with the redefined CVD excluding subarachnoid hemorrhage and atrial fibrillation.**

| CVH status              | No. of cases/Total | CVD-free life years from age 30 to 80 years (95%CI) |                       |
|-------------------------|--------------------|-----------------------------------------------------|-----------------------|
|                         |                    | Unadjusted                                          | Age-and sex- adjusted |
| Low (0-49 points)       | 1,451/8,309        | 44.8 (44.6, 45.1)                                   | 39.9 (39.5, 40.2)     |
| Moderate (50-79 points) | 7,344/72,278       | 47.2 (47.1, 47.2)                                   | 42.7 (42.4, 42.9)     |
| High (80-100 points)    | 363/9,168          | 48.4 (48.2, 48.5)                                   | 45.2 (44.8, 45.6)     |

CVD, cardiovascular disease; CVH, cardiovascular health; CI, confidence interval; LE8, Life's Essential 8.



**Table S9. Estimated numbers of CVD-free life years by CVH status of LE8, excluding 8,253 individuals who died without a diagnosis of CVD.**

| CVH status              | No. of<br>cases/Total | CVD-free life years from age 30 to 80 years<br>(95%CI) |                          |
|-------------------------|-----------------------|--------------------------------------------------------|--------------------------|
|                         |                       | Unadjusted                                             | Age-and sex-<br>adjusted |
|                         |                       | Low (0-49 points)                                      | 983/4,992                |
| Moderate (50-79 points) | 6,268/55,915          | 46.4 (46.3, 46.5)                                      | 42.4 (42.2, 42.6)        |
| High (80-100 points)    | 349/8,204             | 47.8 (47.6, 48.0)                                      | 44.8 (44.4, 45.2)        |

CVD, cardiovascular disease; CVH, cardiovascular health; CI, confidence interval; LE8, Life's Essential 8.

**Table S10. Estimated numbers of CVD-free life years by CVH status of LE8, further adjusted for education and income.**

| <b>CVH status</b>       | <b>No. of cases/Total</b> | <b>CVD-free life years from age 30 to 80<br/>years (95%CI)</b> |
|-------------------------|---------------------------|----------------------------------------------------------------|
| Low (0-49 points)       | 1,552/8,309               | 39.5 (39.2, 39.8)                                              |
| Moderate (50-79 points) | 8,003/72,278              | 42.3 (42.0, 42.5)                                              |
| High (80-100 points)    | 422/9,168                 | 44.6 (44.2, 45.0)                                              |

CVD, cardiovascular disease; CVH, cardiovascular health; CI, confidence interval; LE8, Life's Essential 8.

**Figure S1. Flow chart of participants included and excluded in the analyses.**

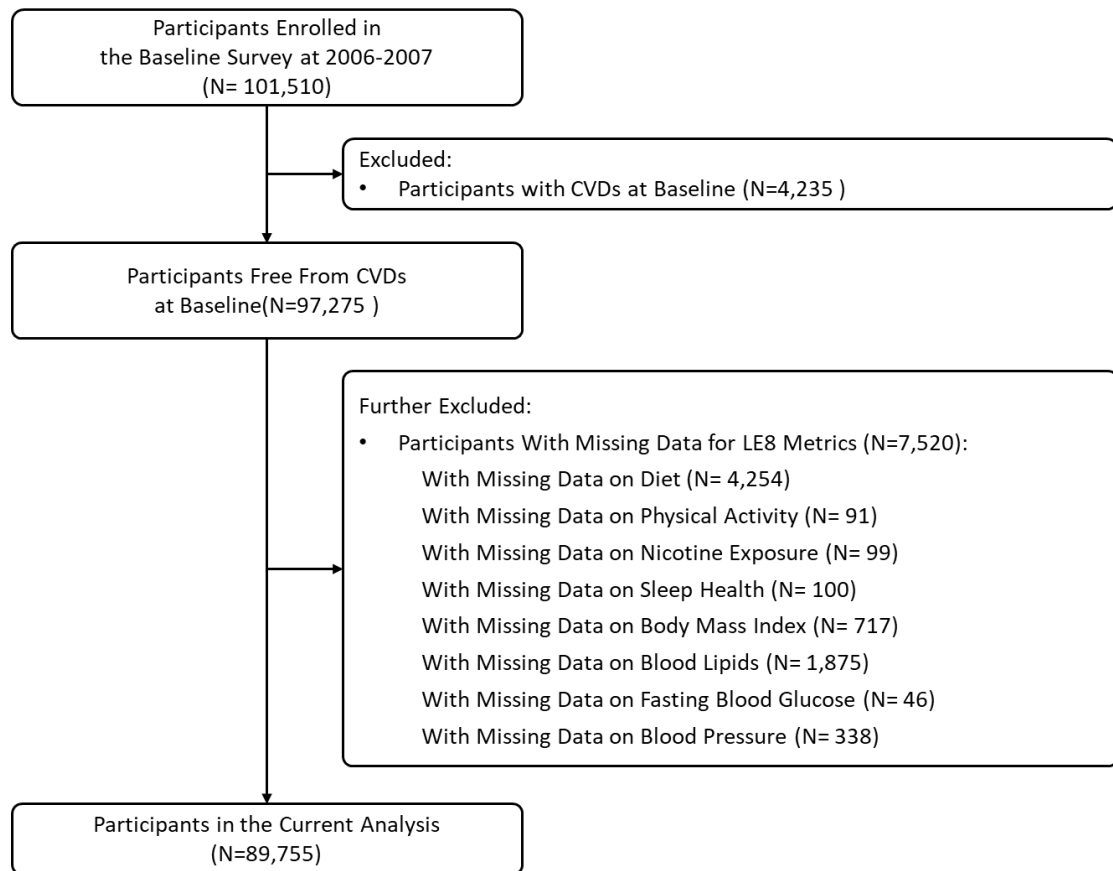

Participants were included in the analyses if they did not have a history of CVD at baseline, had valid information on metrics of LE8, and had follow-up for incident CVD.

CVD, cardiovascular disease; LE8, Life's Essential 8.

**Figure S2. The Kaplan Meier plot of CVH groups.**

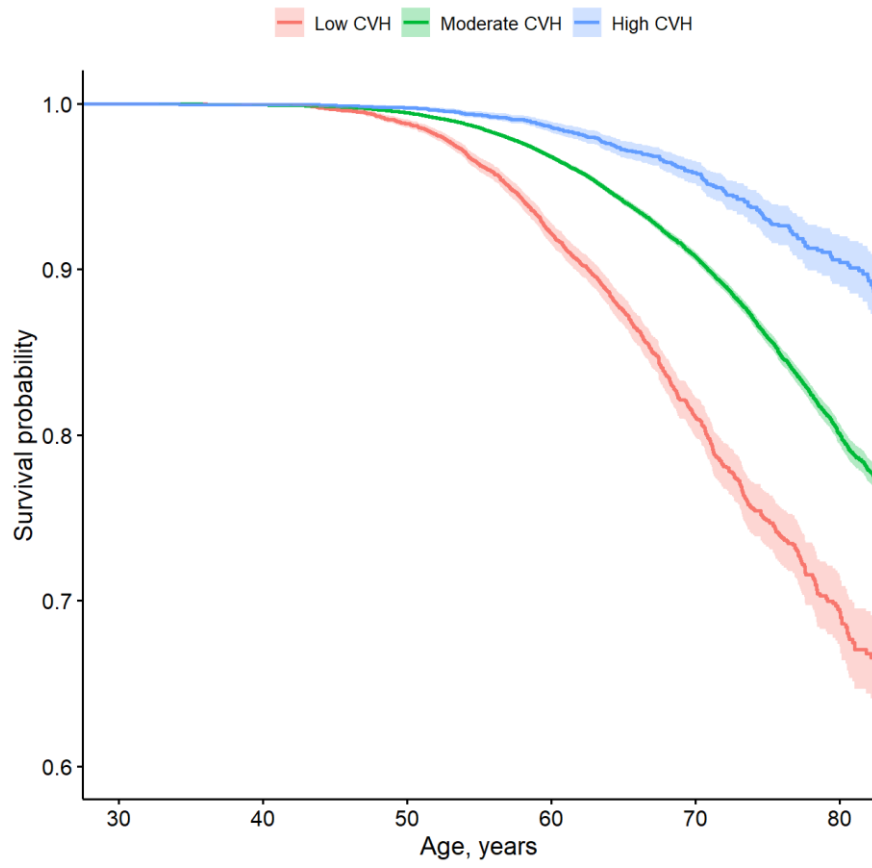

CVH, cardiovascular health.
